# Supplementary material for: Prospective, longitudinal analysis of the gut microbiome in patients with locally advanced rectal cancer predicts response to neoadjuvant concurrent chemoradiotherapy
Source: Springer Nature journal article supplement (doi:10.1186/s12967-023-04054-1), 2023-03-26
Supplement: MOESM1 [file 24676910]

**a**

Before batch effect removal

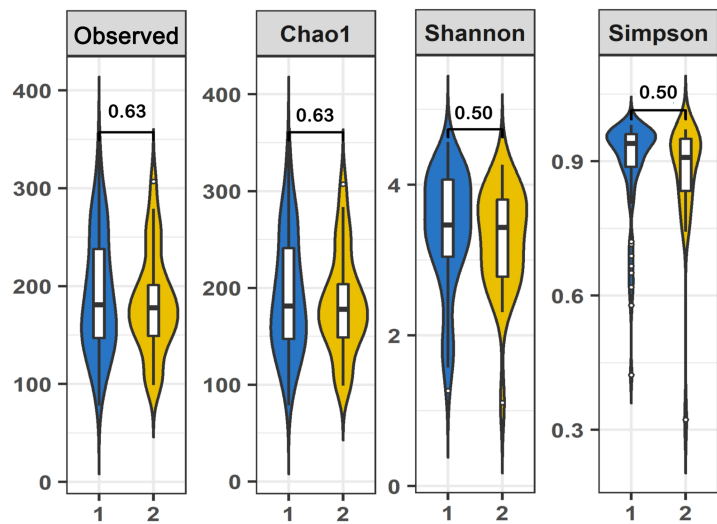

After batch effect removal

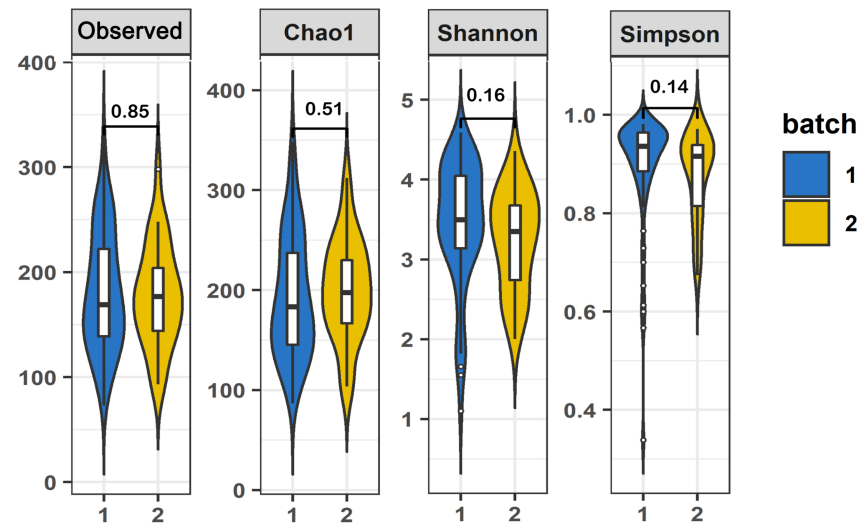**b**

Before batch effect removal

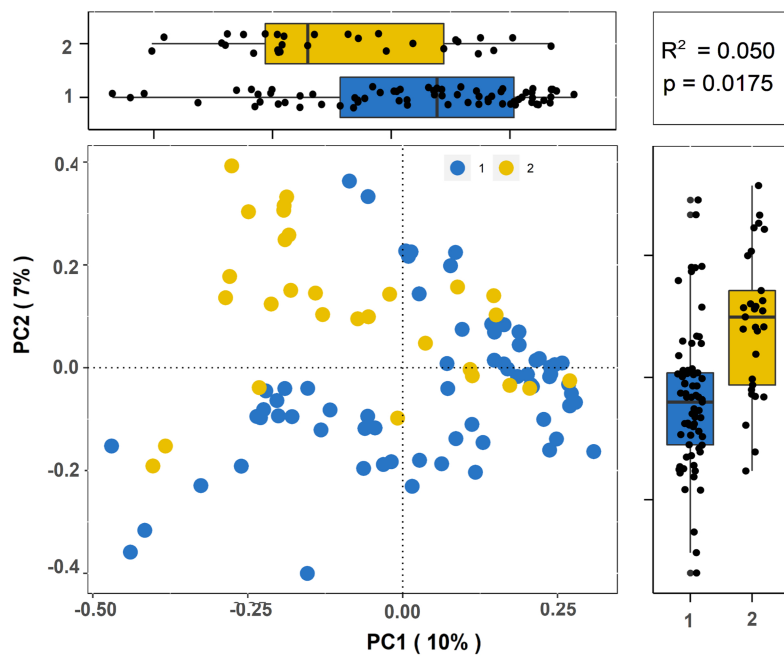

After batch effect removal

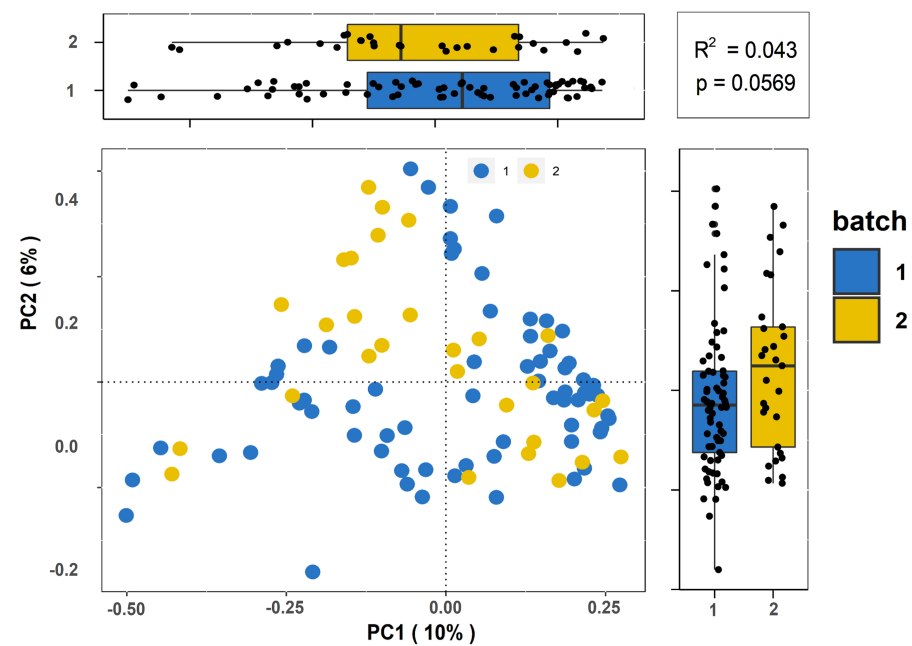**c**

Before batch effect removal

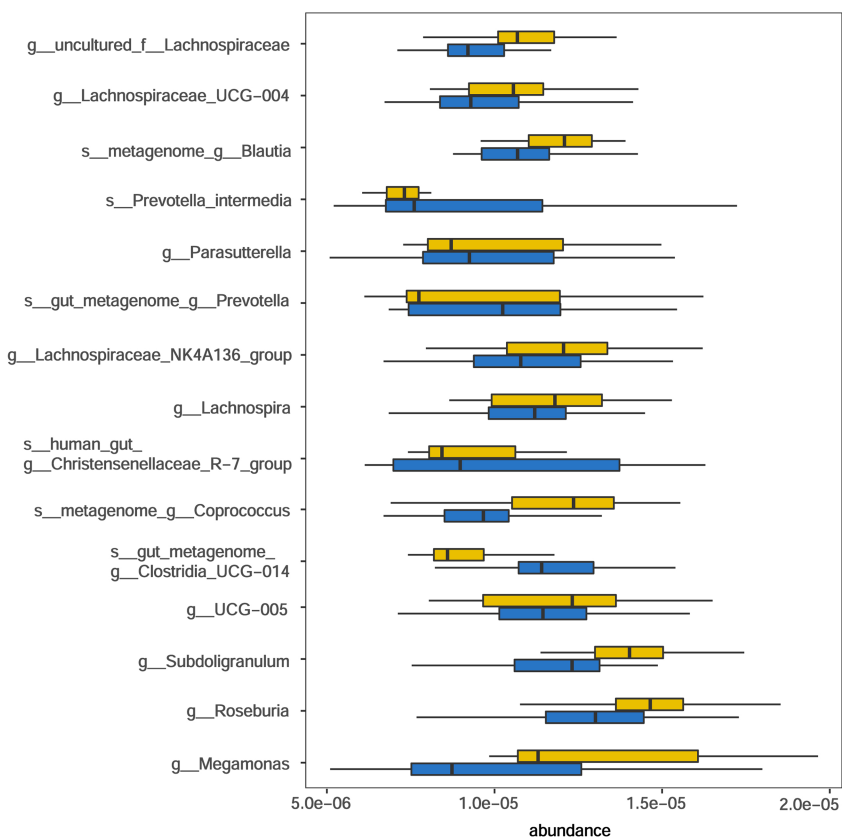

After batch effect removal

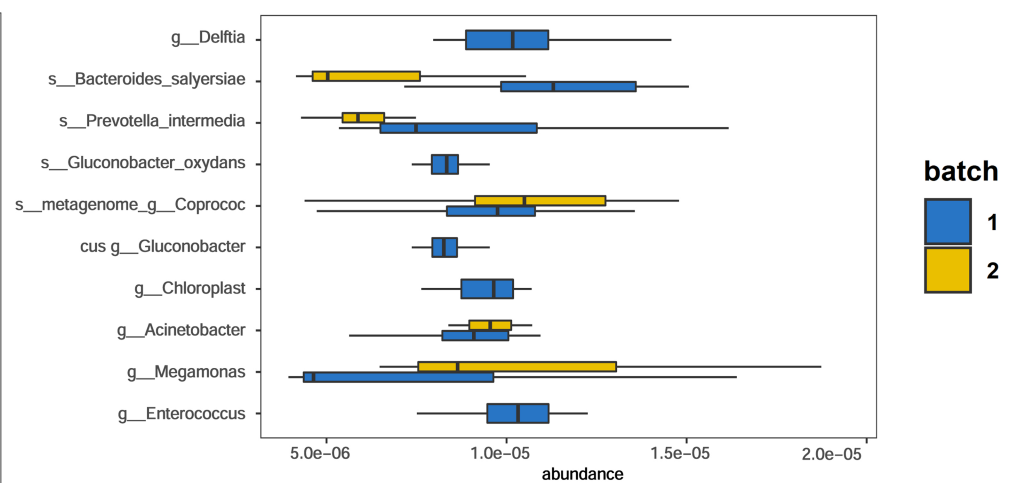

FigureS1

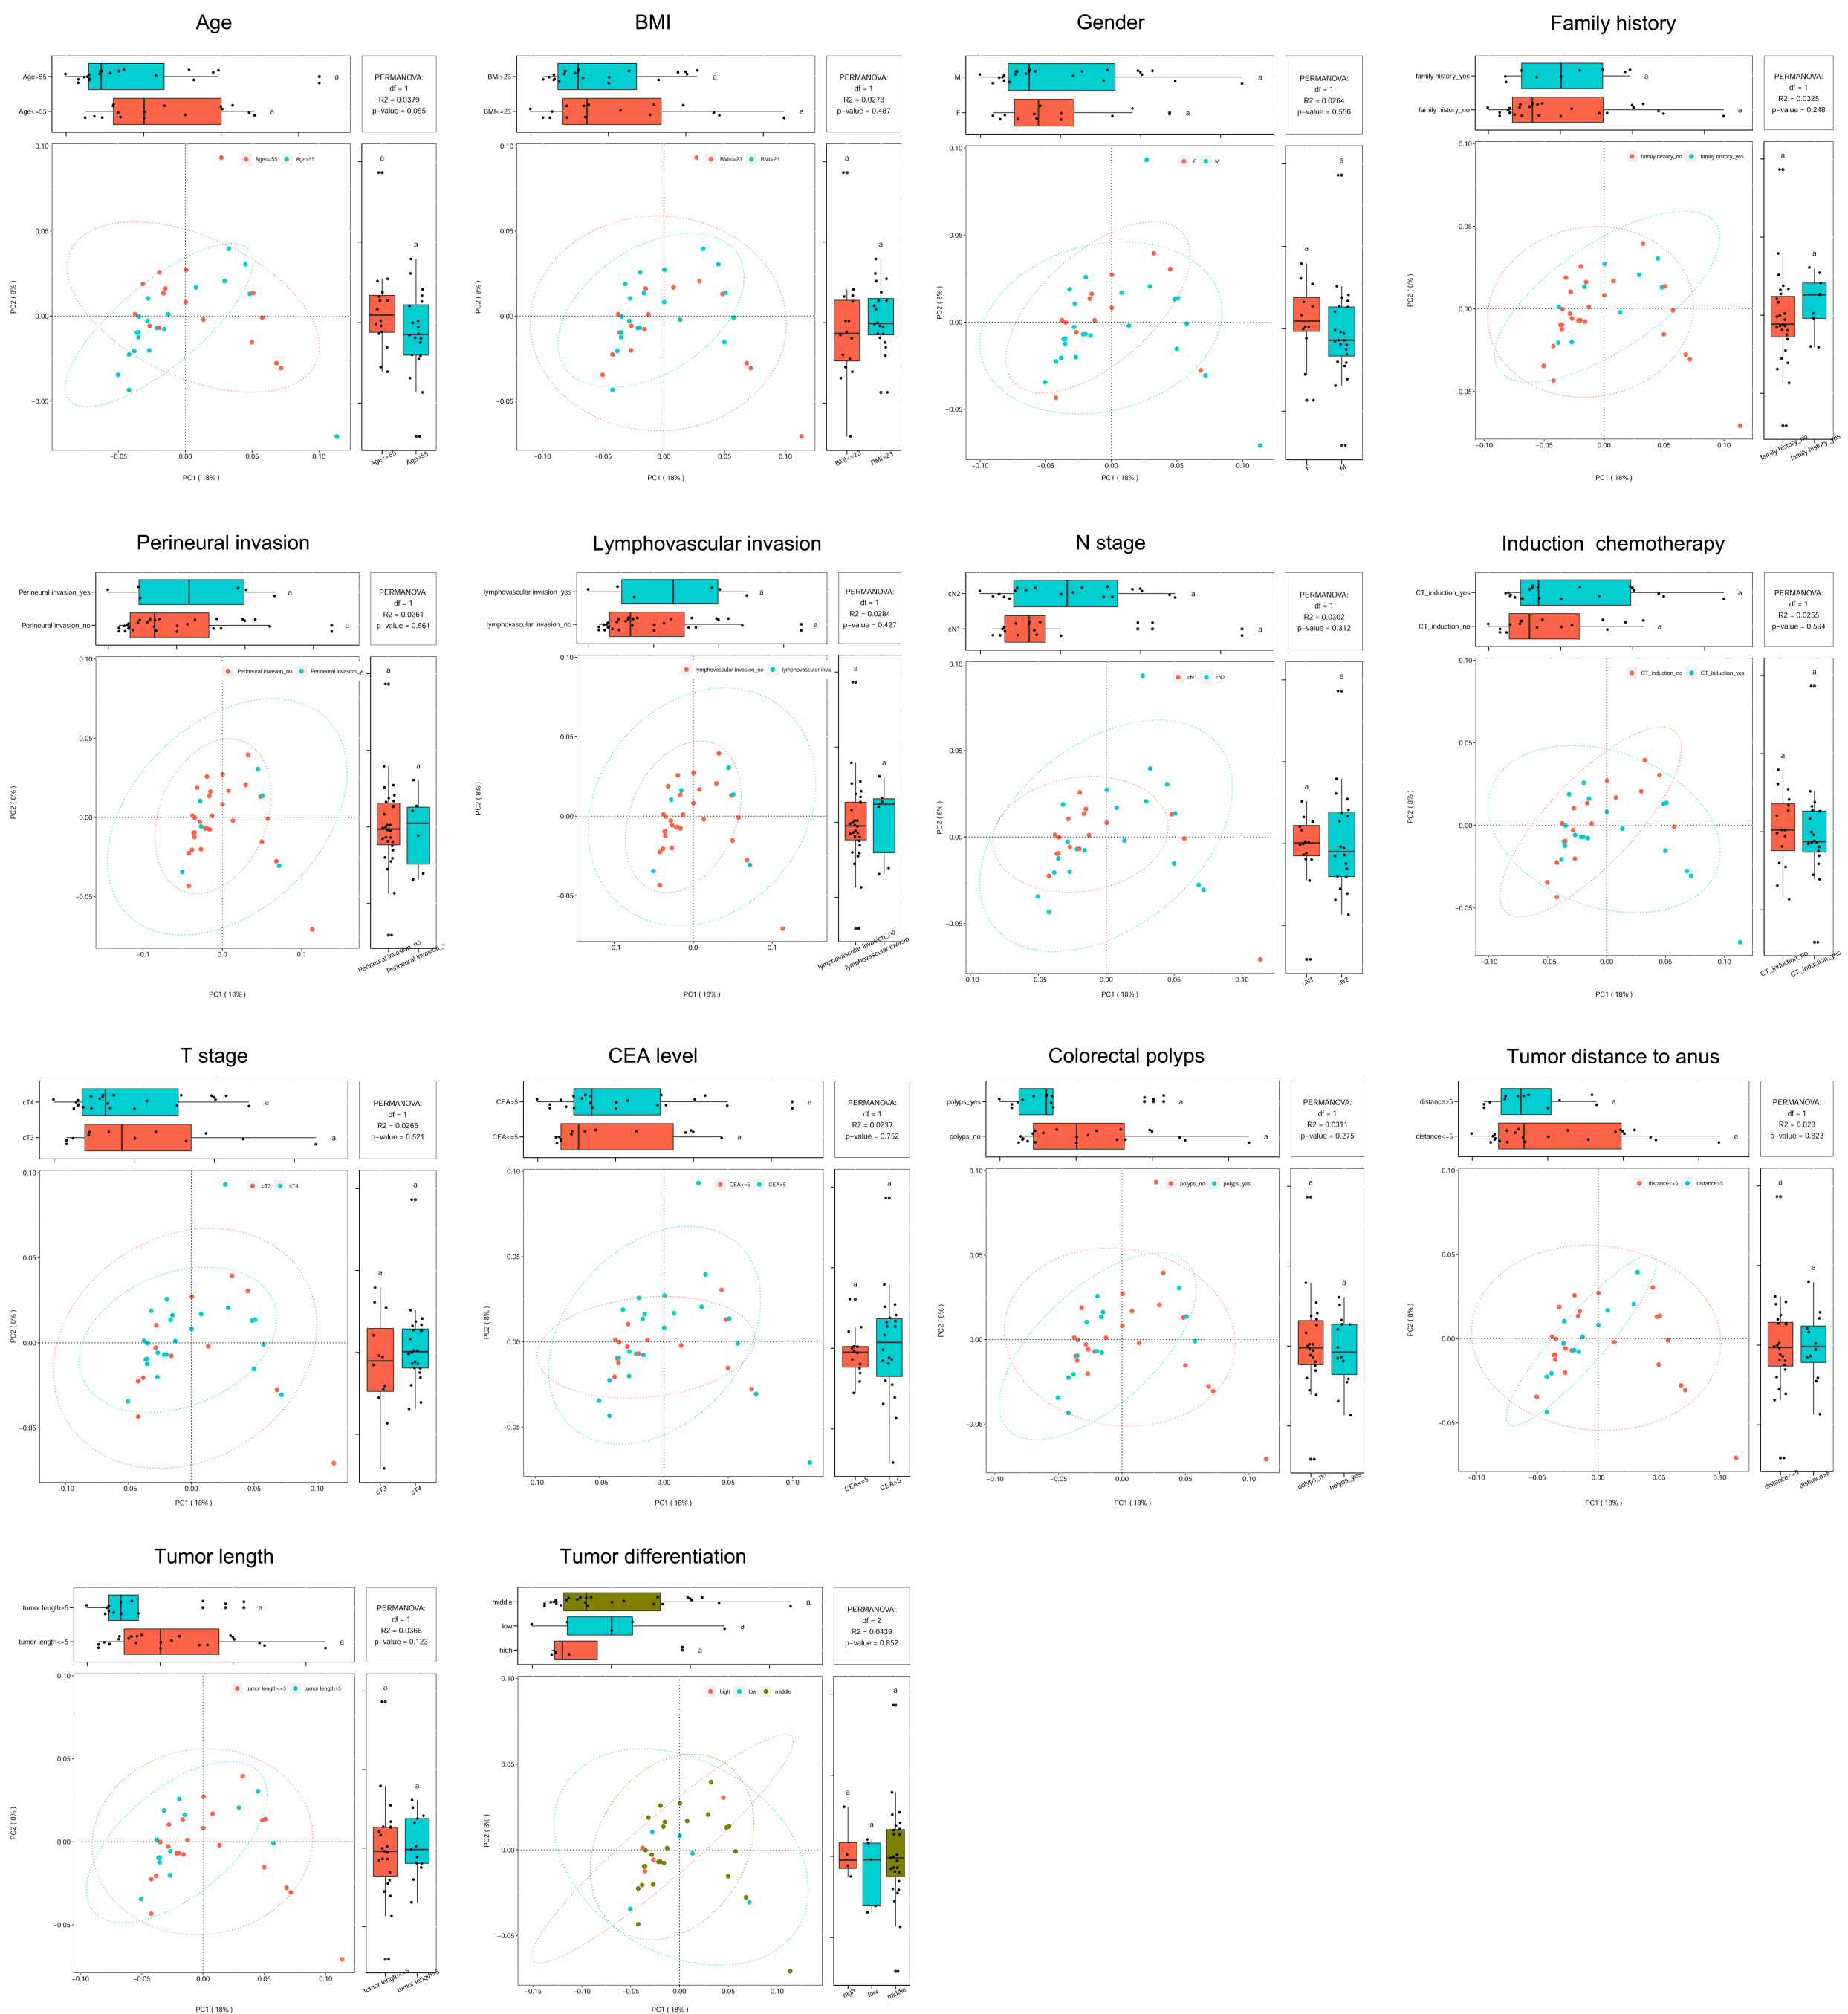

Figure S2



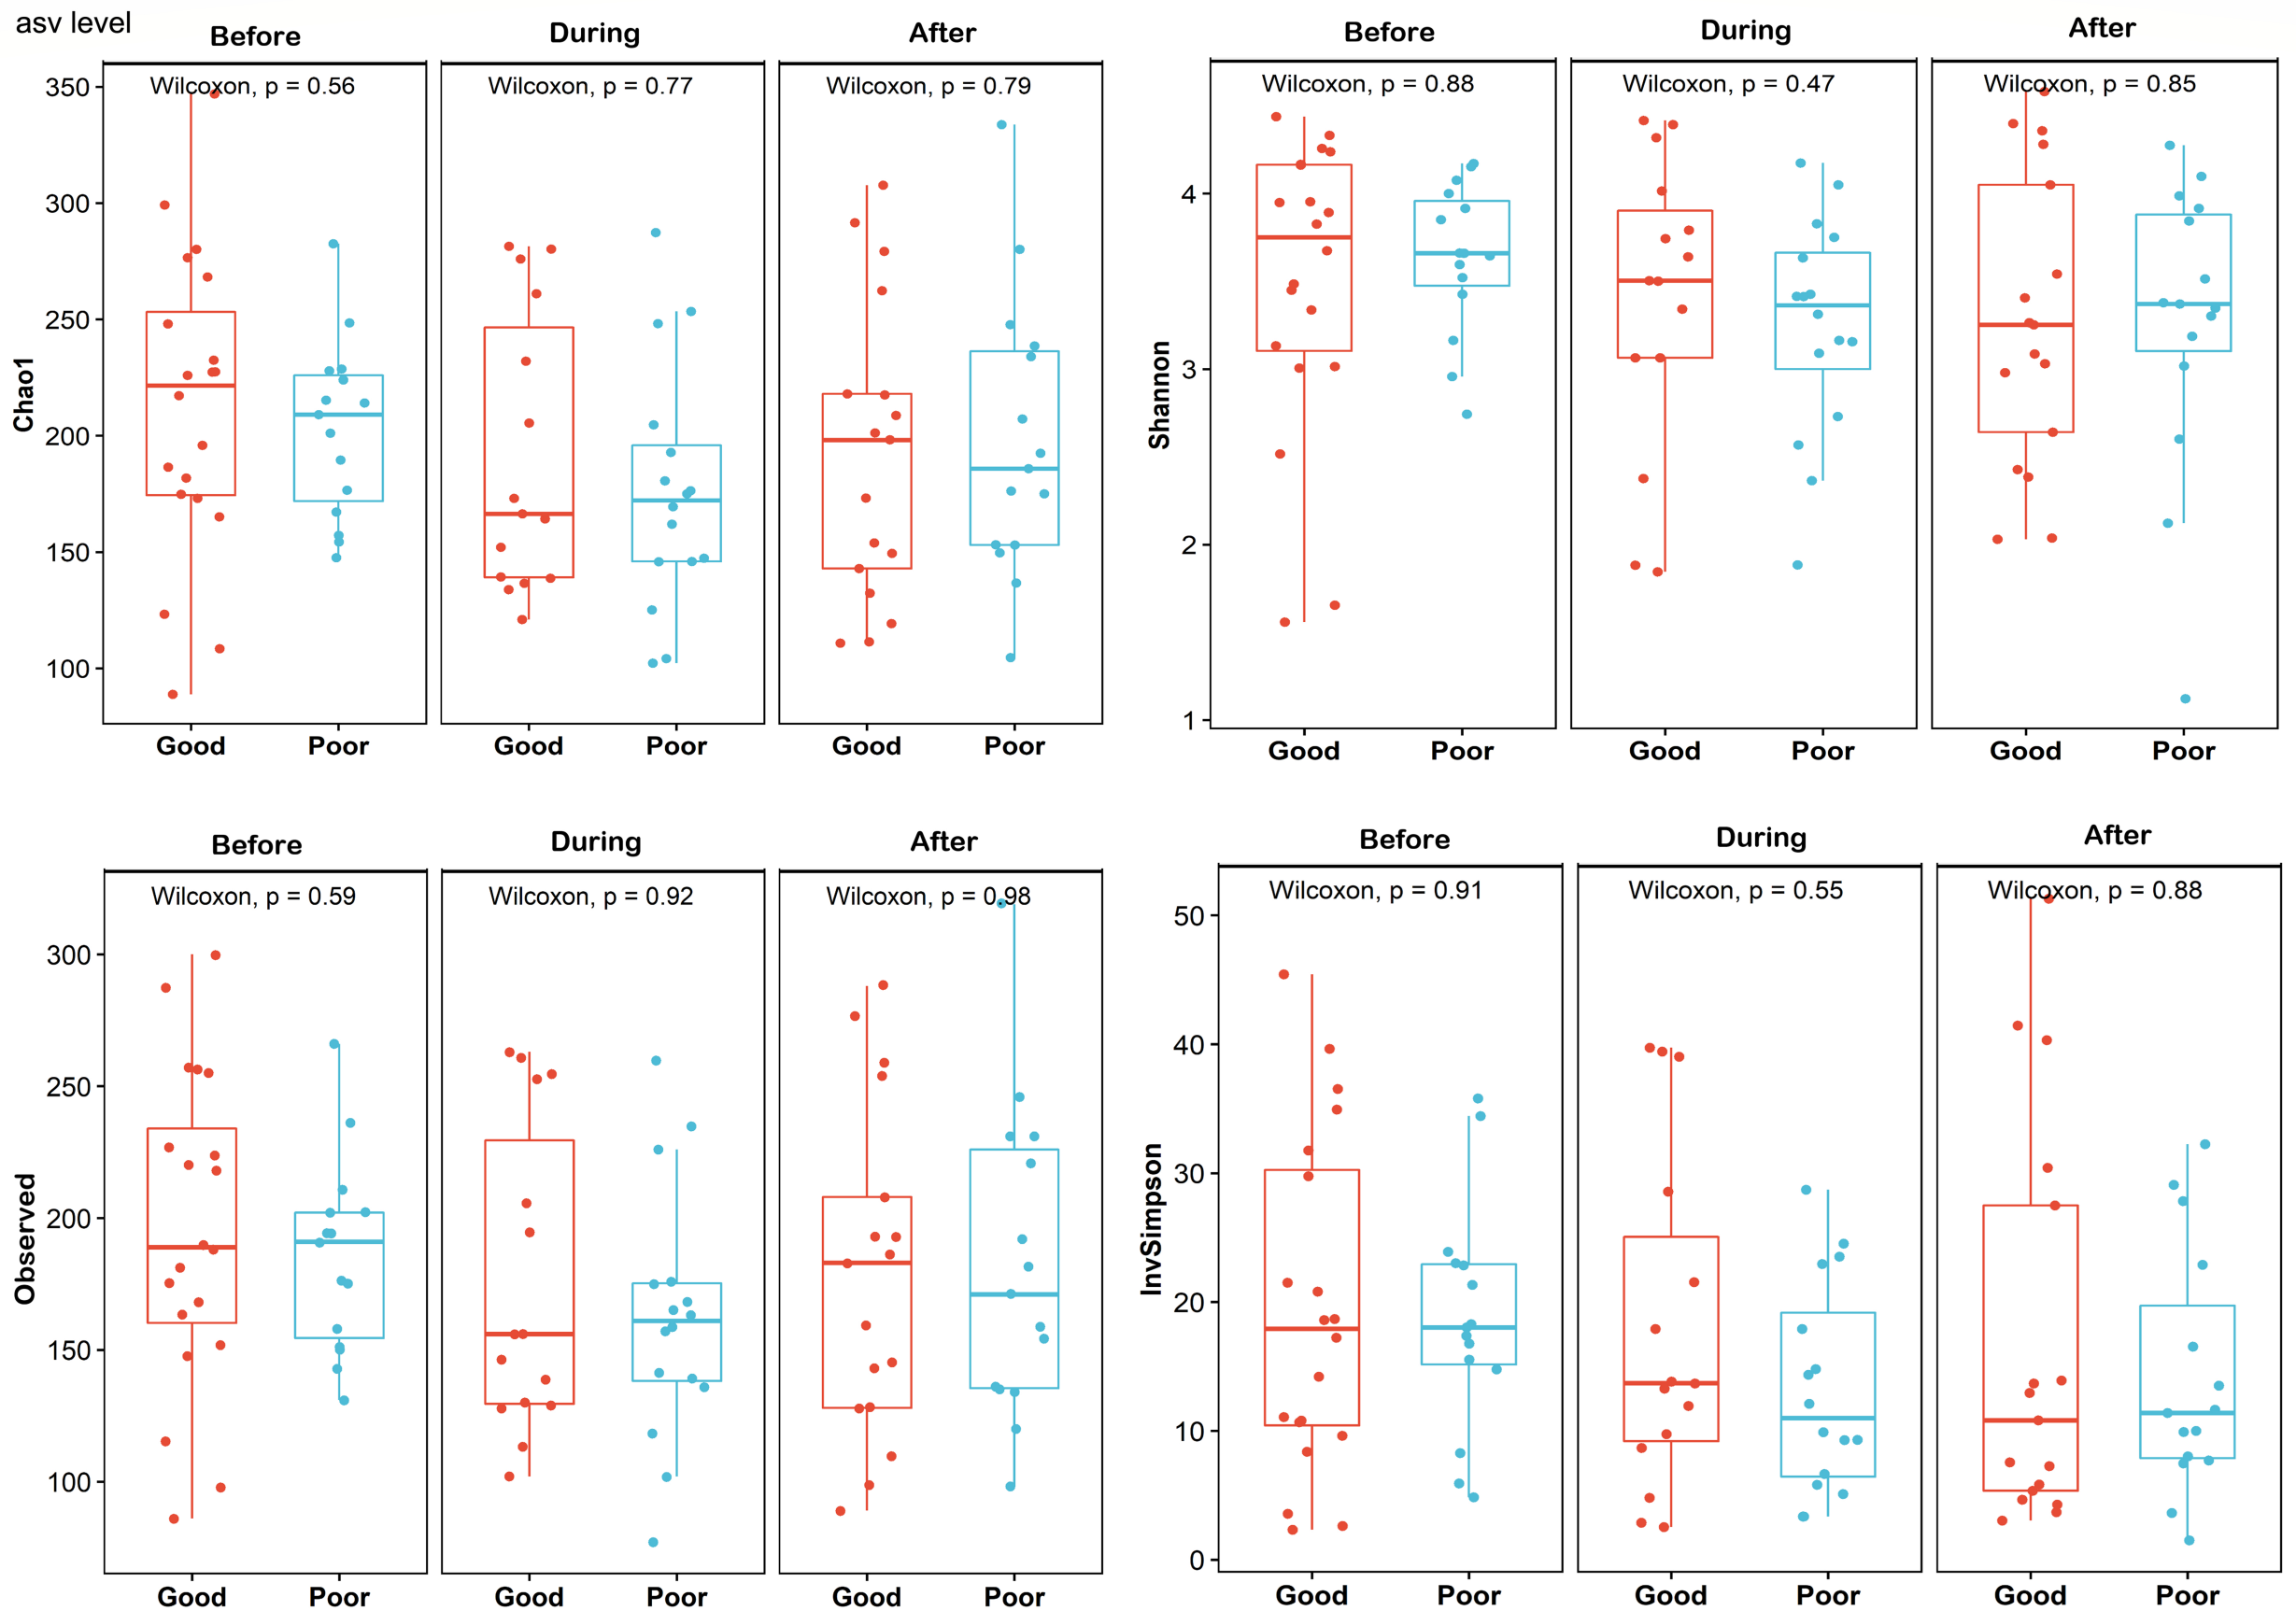

FigureS3

ASV level

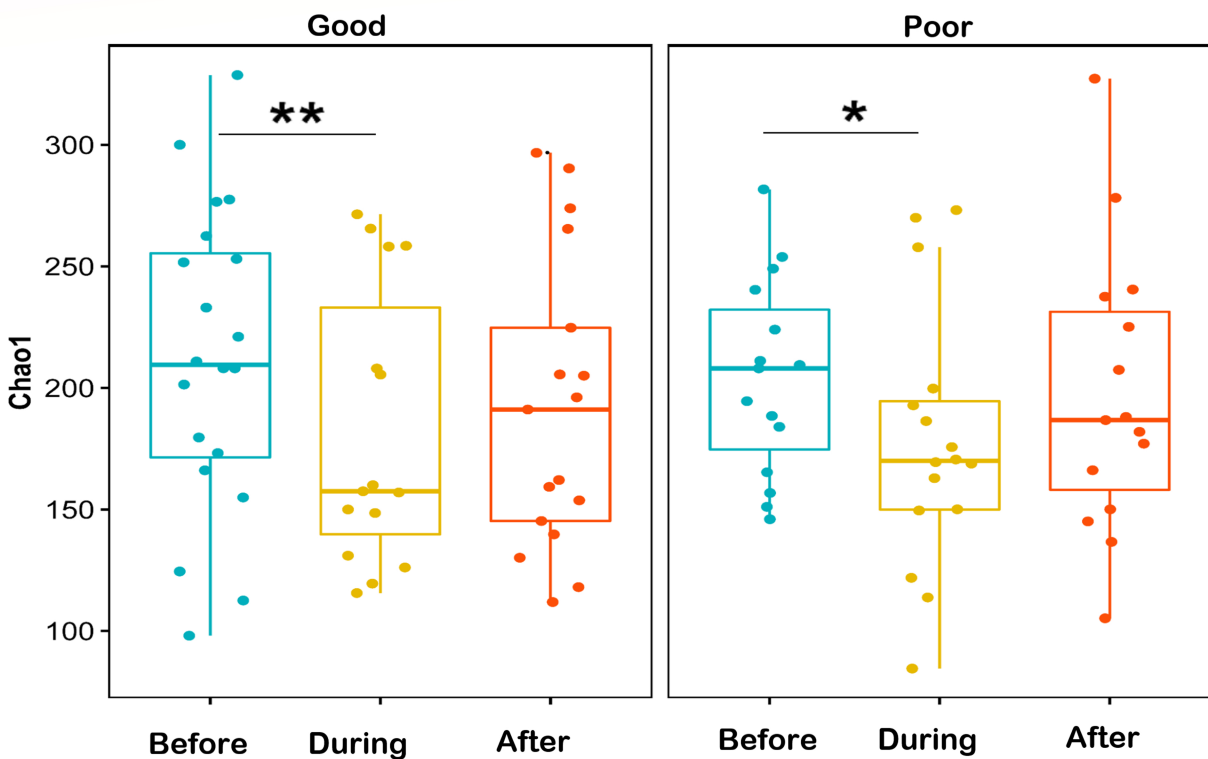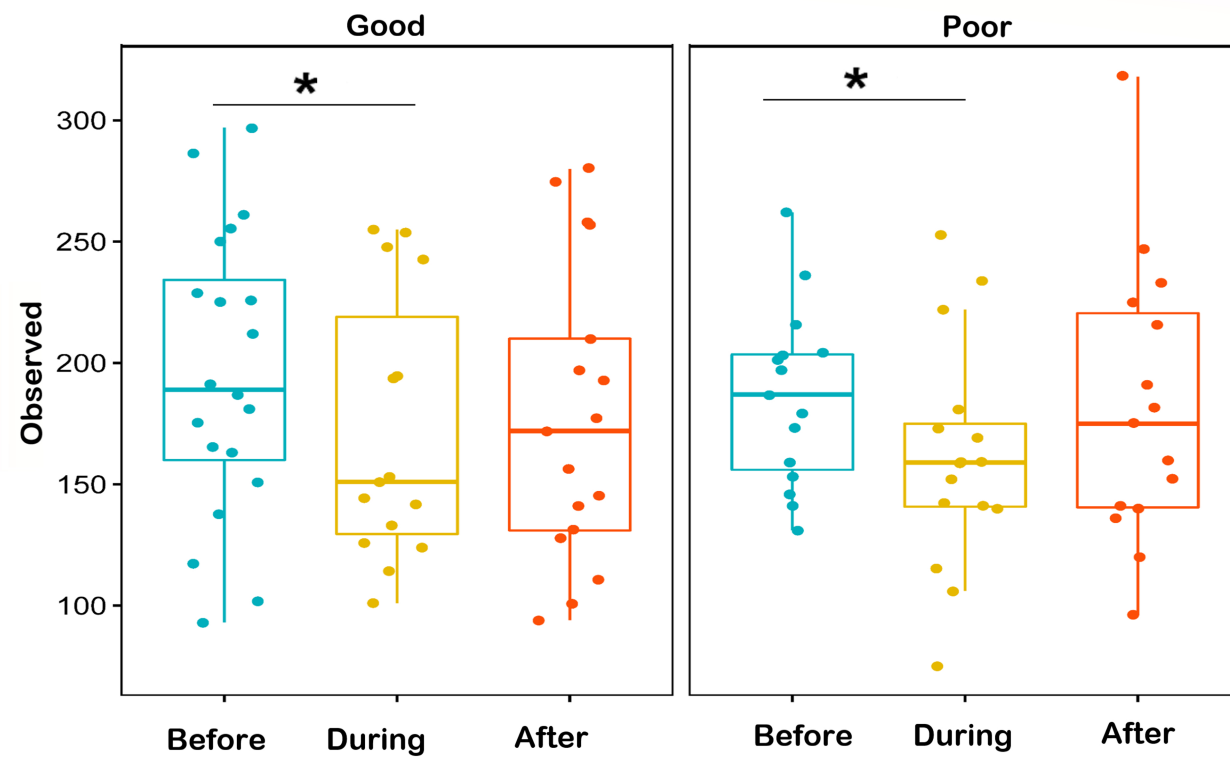

Genus level

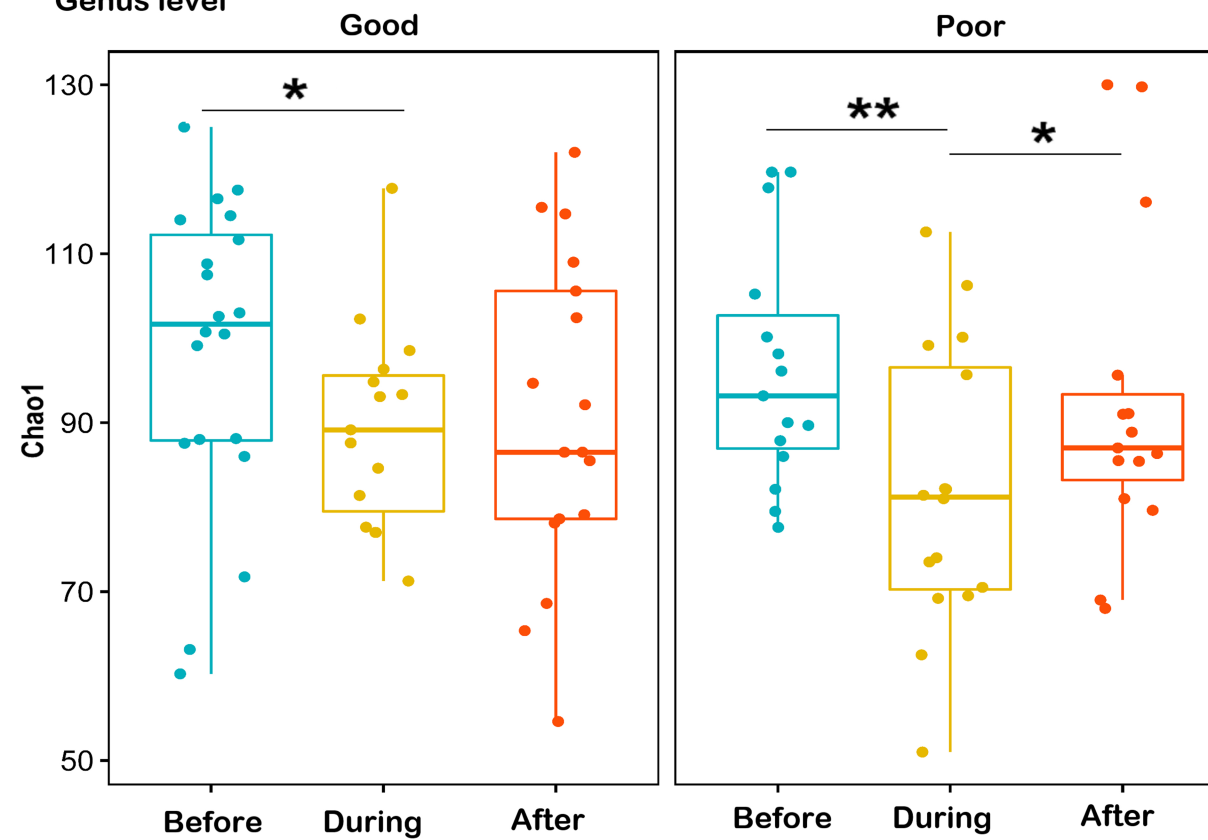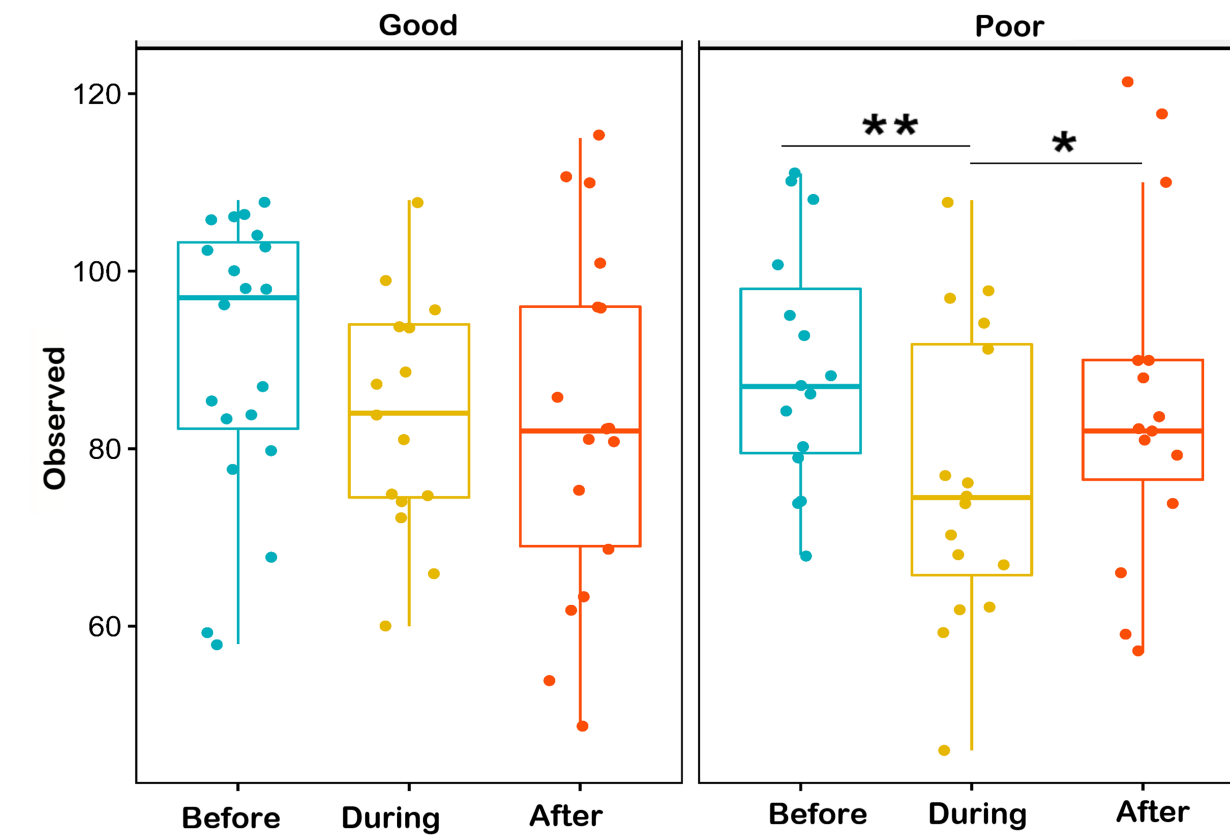

FigureS4

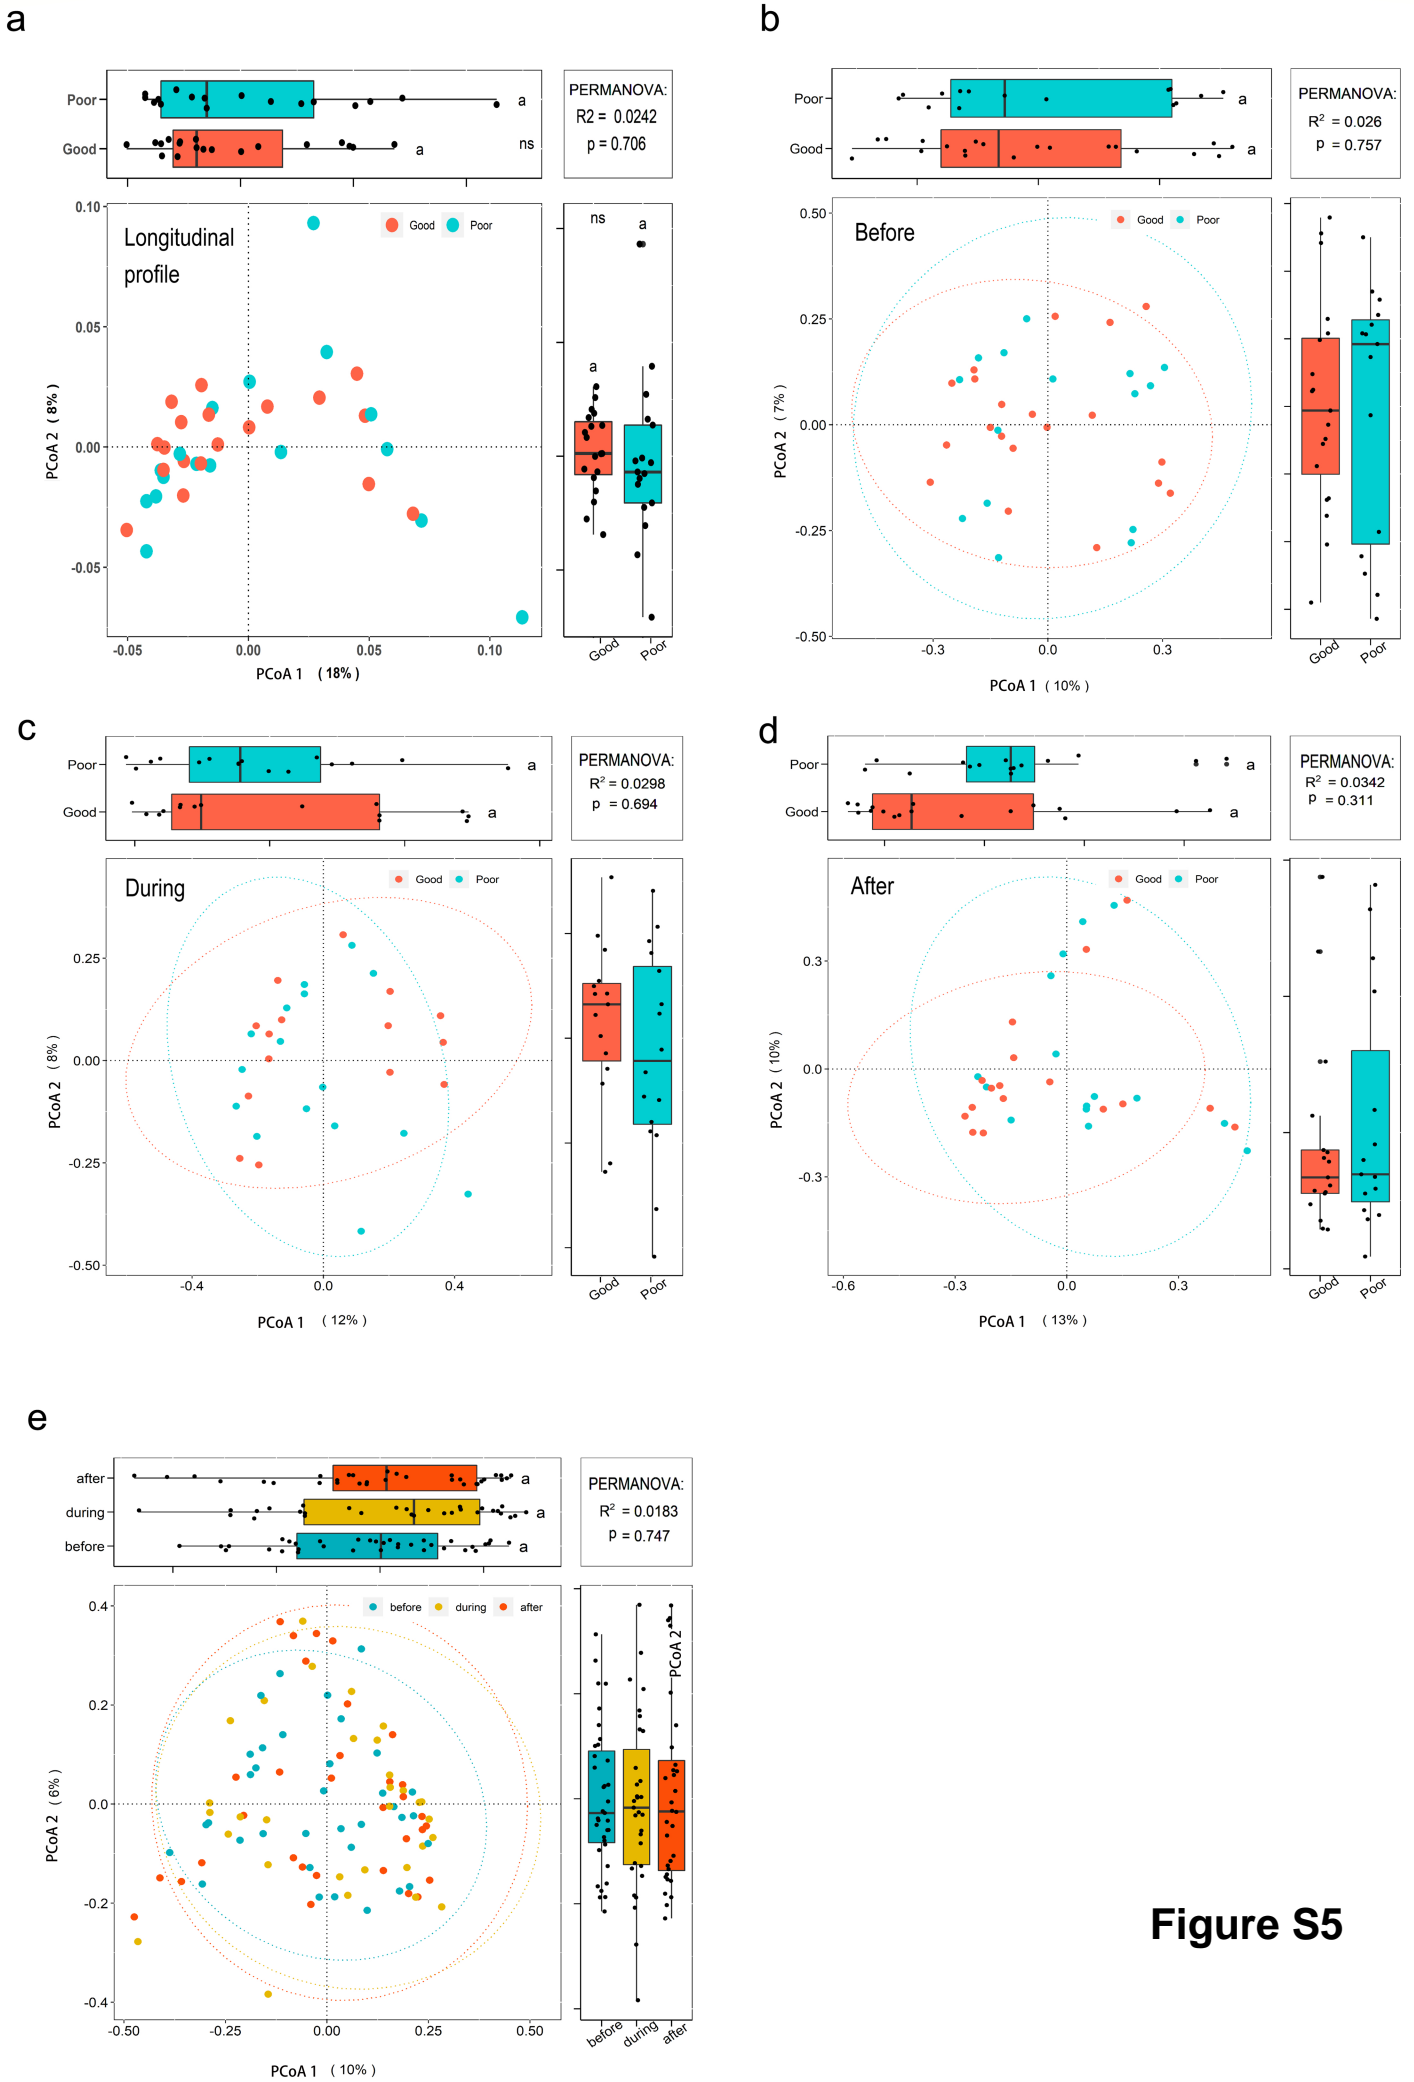

**Figure S5**

## Before nCCRT

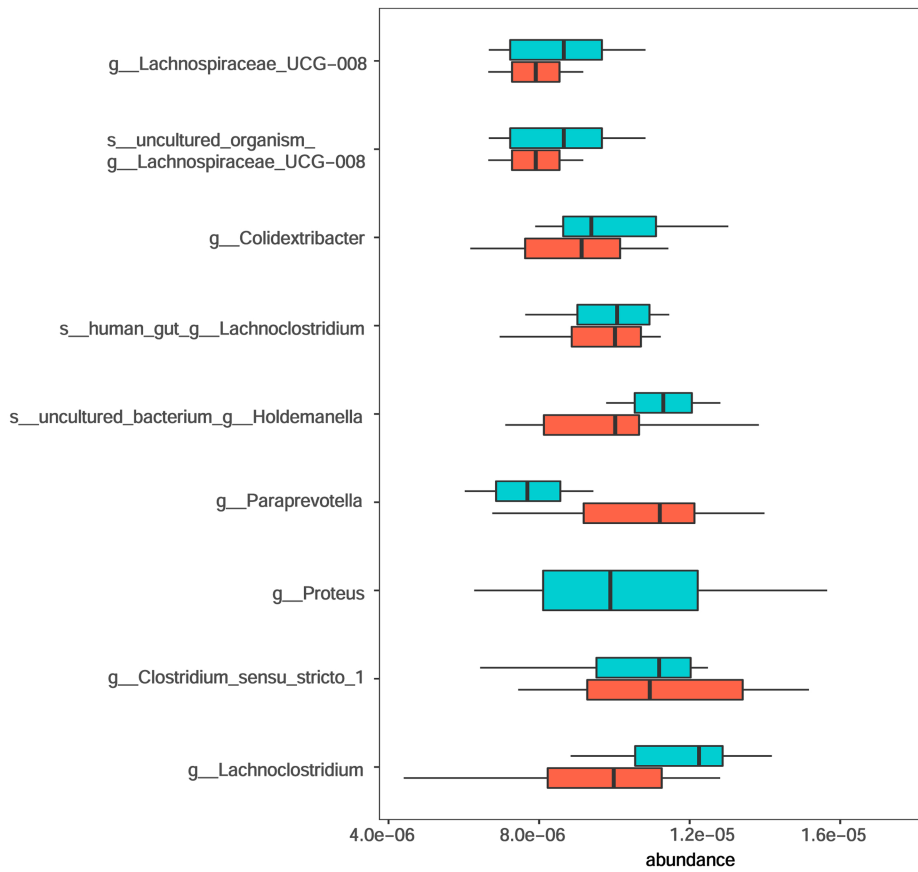

## After nCCRT

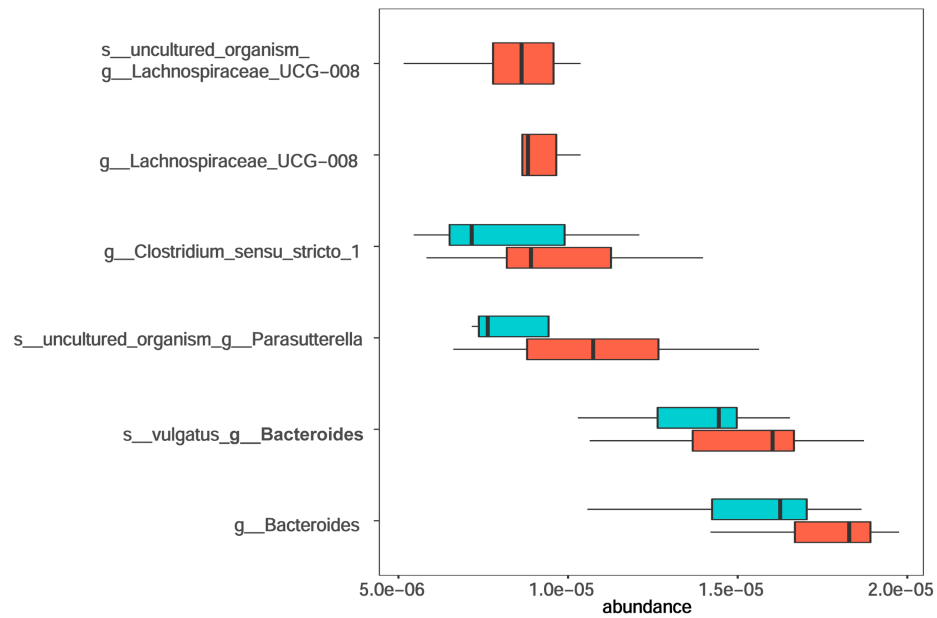

## During nCCRT

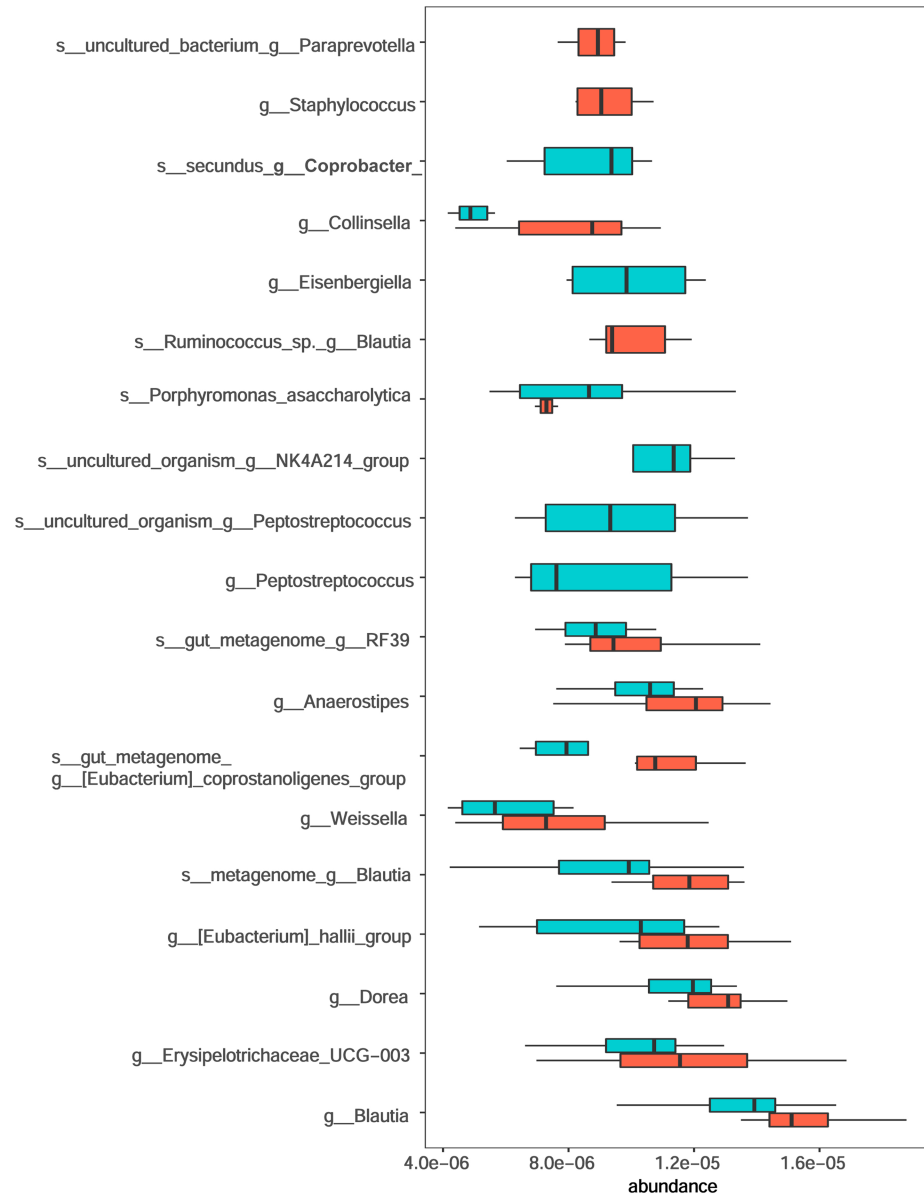

effect

Good

Poor



**a**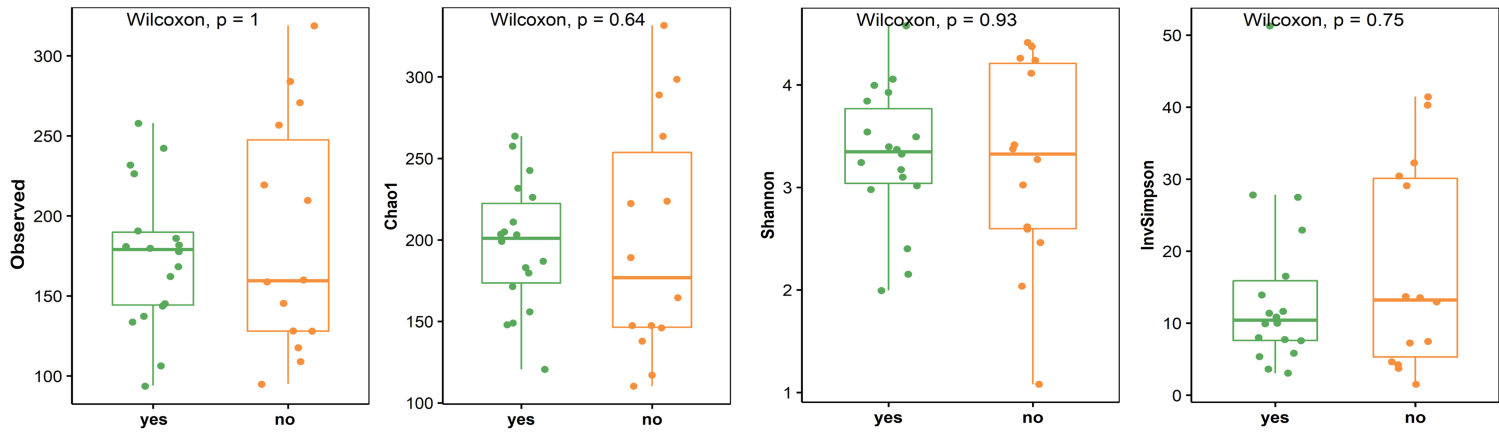**b**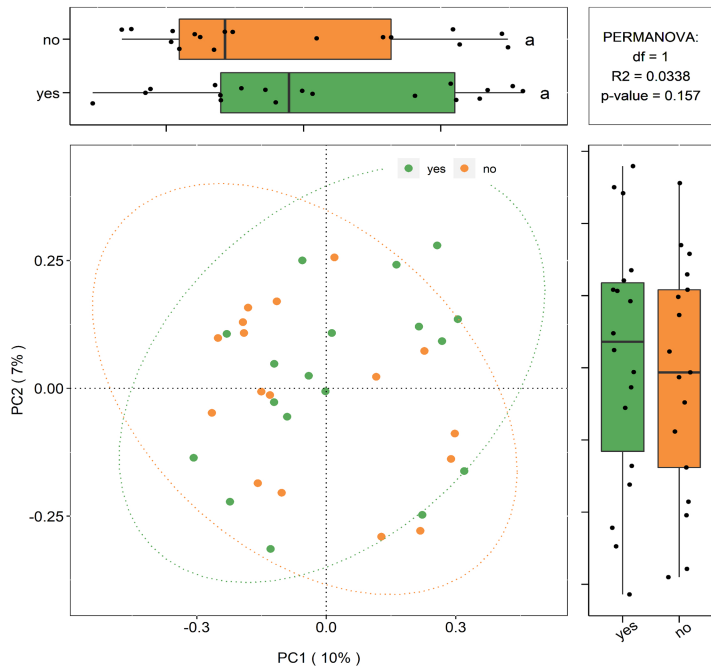**c**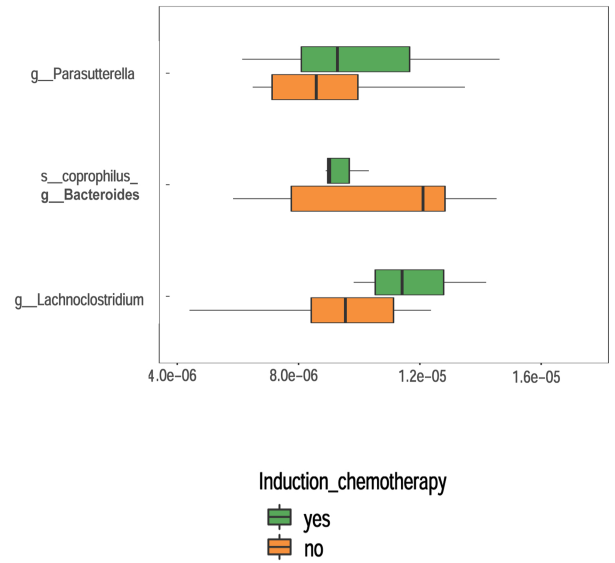**FigureS7**

## Before nCCRT

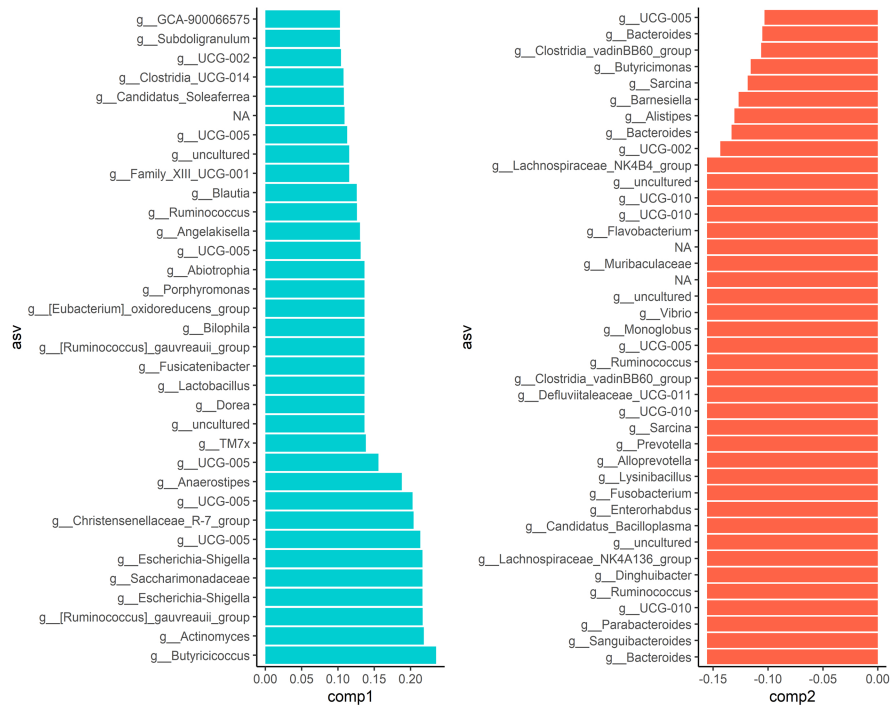

## During nCCRT

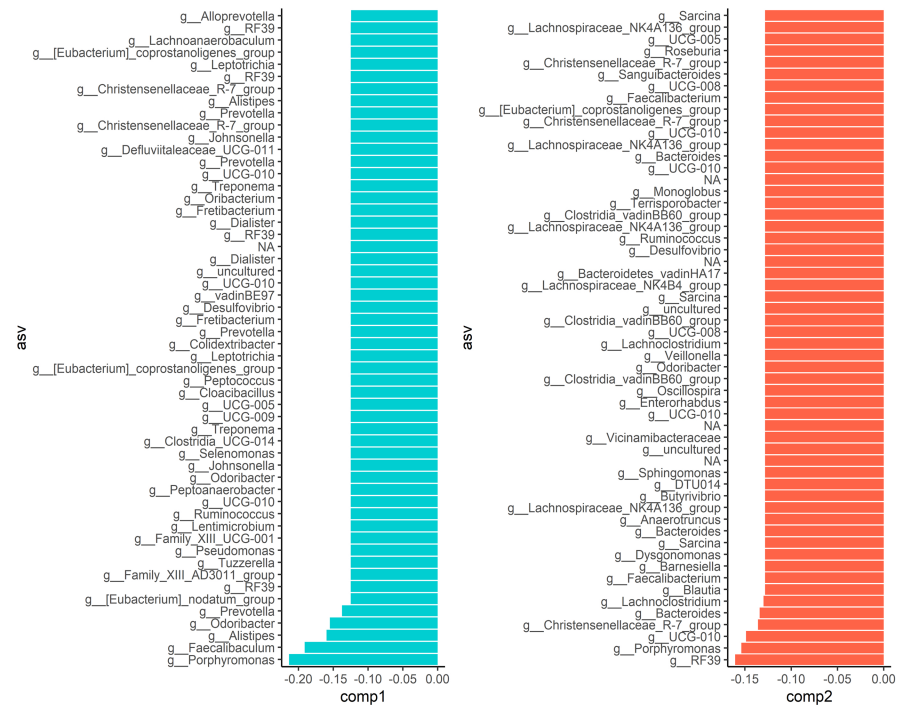

## After nCCRT

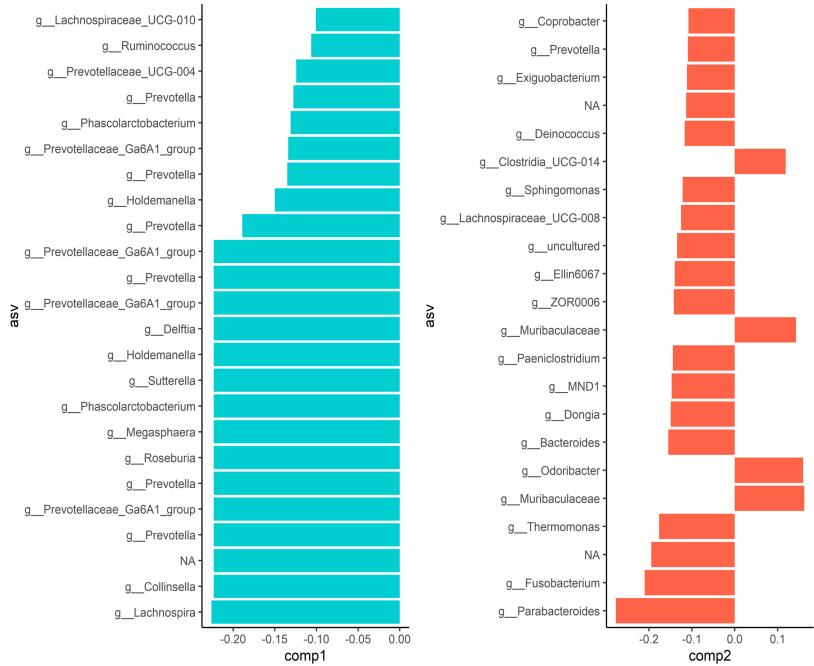

FigureS8

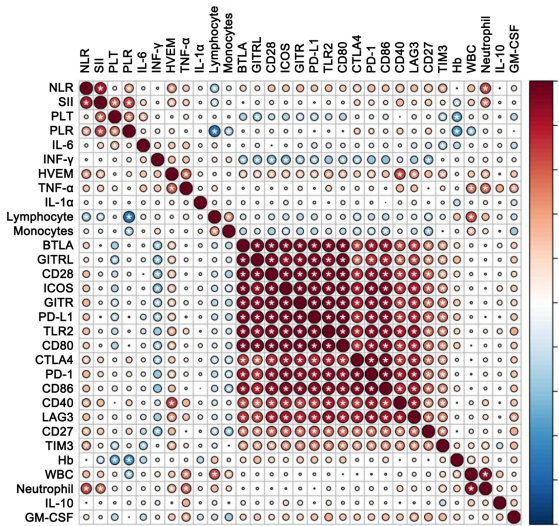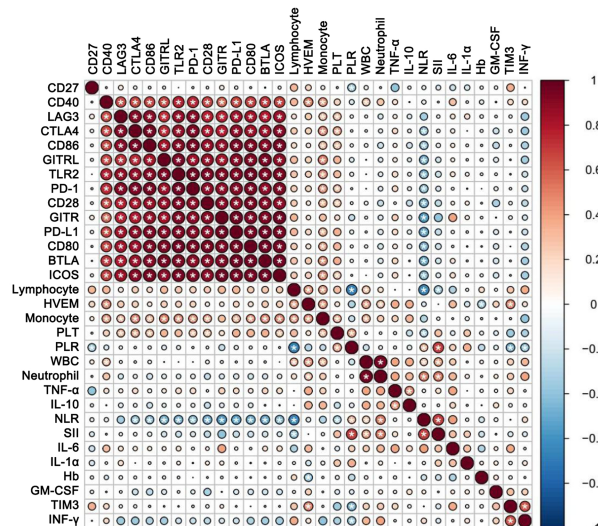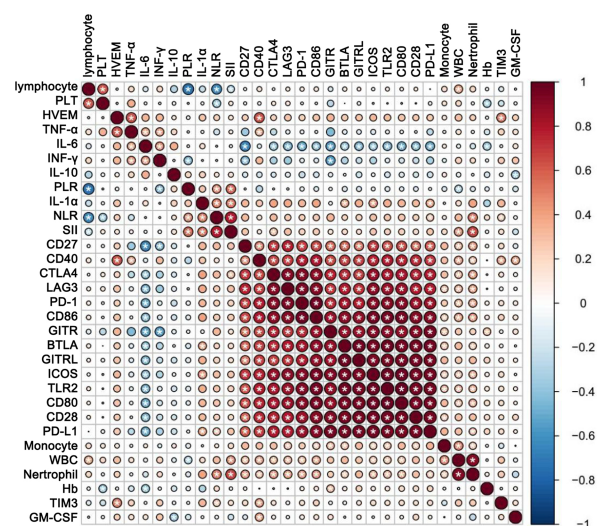

FigureS9
